# Supplementary material for: CRISPR-LbCpf1 prevents choroidal neovascularization in a mouse model of age-related macular degeneration
Source: PubMed Central journal article supplement (PMC5945874; doi:10.1038/s41467-018-04175-y), 2018-05-10
Supplement: 41467_2018_4175_MOESM1_ESM.pdf [file 41467_2018_4175_MOESM1_ESM.pdf]

**Supplementary Information for Koo *et al.***

**CRISPR-LbCpf1 prevents choroidal neovascularization in a mouse model of age-related macular degeneration**

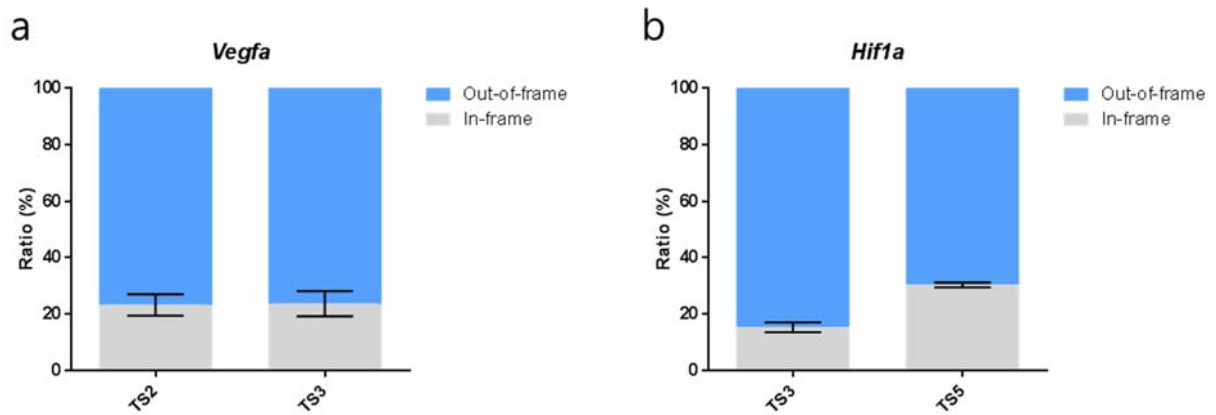

**Supplementary Figure 1. Mutant sequences presented with two fractions, in-frame versus out-of-frame indels at the *Vegfa* (a) or *Hif1a* (b) target site.** crRNA plasmids were transfected into mouse C2C12 cells together with LbCpf1 plasmids. Mutation sequences were analyzed by deep sequencing using genome DNA isolated from cells after 48 h of transfection. Mutant sequences are divided into two fractions, out-of-frame versus in-frame indels and presented in ratio (%). Error bars indicate s.e.m. (n=3).

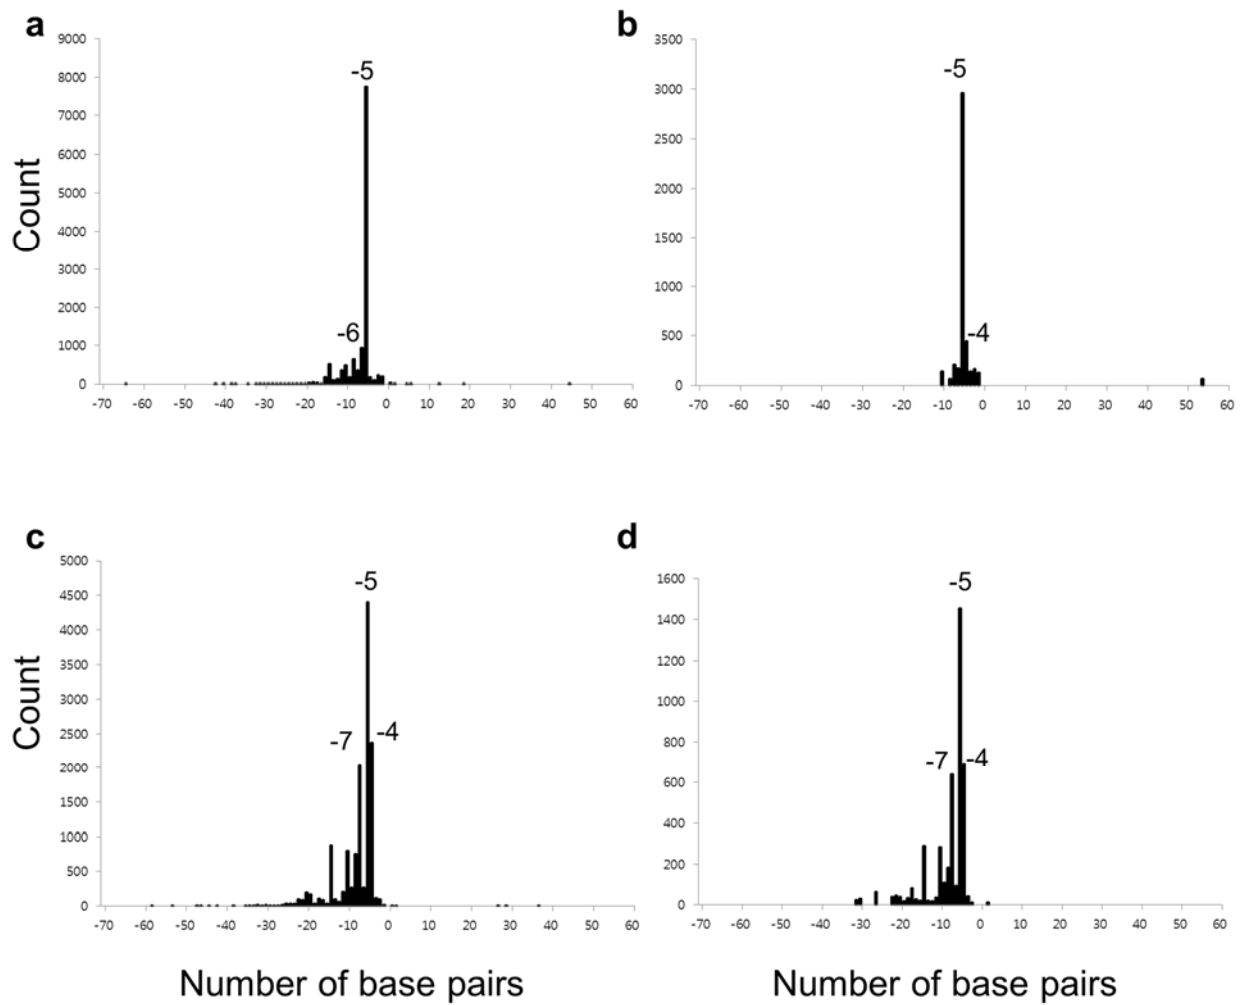

**Supplementary Figure 2.** The number of mutant sequence reads binned by the deletion or insertion size in base pairs at the *Vegfa* (a, b) and *Hif1a* (c, d) target sites in the retina (a, c) and RPE (b, d) cells using deep sequencing 6 weeks post-intravitreal injection of AAV9-Cpf1-*Vegfa* or *Hif1a*.

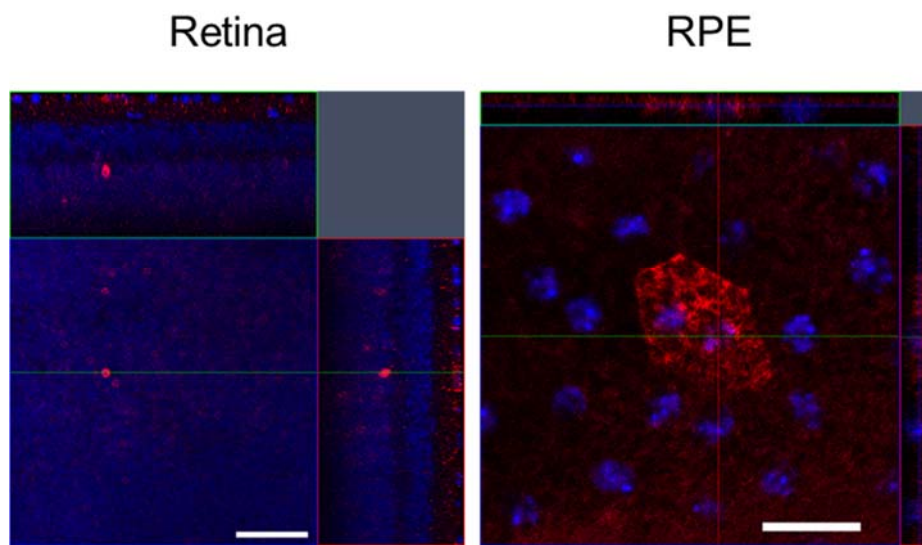

**Supplementary Figure. 3.** Representative confocal images of *in vivo* HA expression in retina (x 400, scale bar, 50 μm) and RPE cells (x 1000, scale bar, 20 μm) of AAV-Cpf1-*Hif1a* injected mice 6 weeks after injection (n=4). HA was stained with anti-HA antibody (red). Nuclei were counter-stained with DAPI (blue).

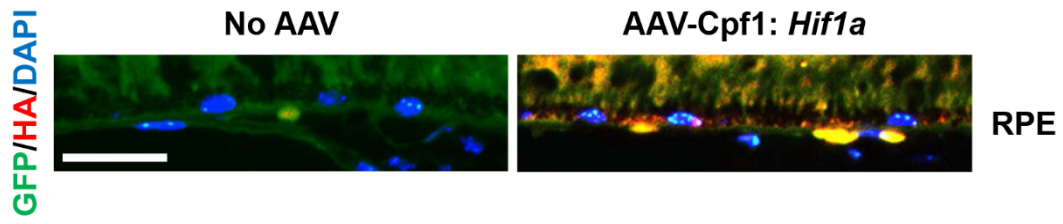

**Supplementary Figure. 4.** Expression of GFP and HA in the retinal pigment epithelium of mice treated with PBS (No AAV) or AAV-Cpf1-*Hif1a*. Scale bar, 20  $\mu\text{m}$ . RPE, retinal pigment epithelium.

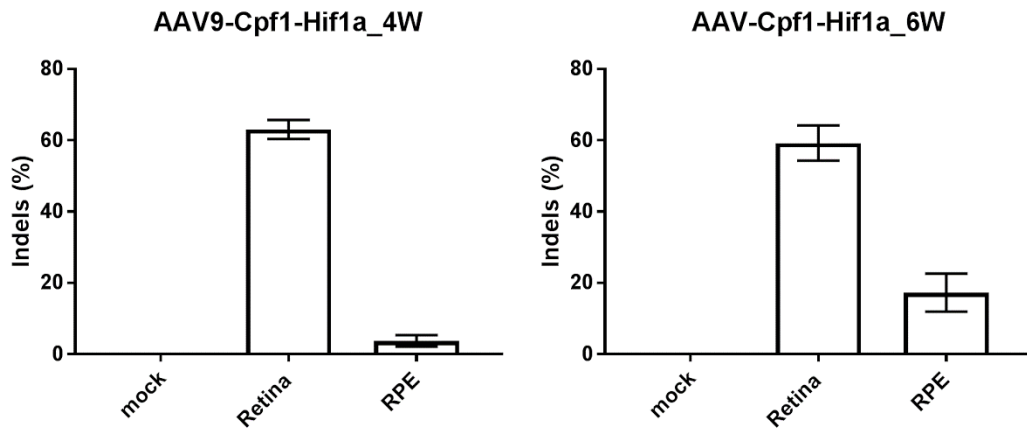

**Supplementary Figure. 5. Retinal genome editing of LbCpf1.** Indel frequencies at the *Hif1a* target site in the retina and RPE cells using deep sequencing 4 and 6 weeks post-intravitreal injection of AAV9-Cpf1-*Hif1a*. Error bar indicates s.e.m. (n = 4).

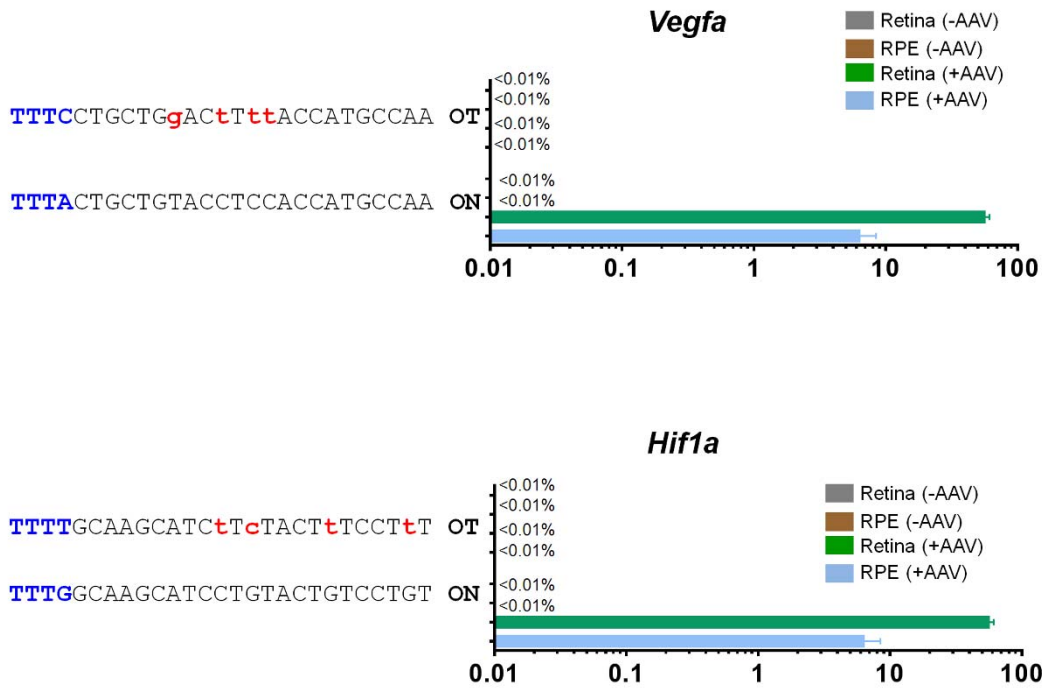

**Supplementary Figure. 6. Indel frequencies at on-target and potential off-target predicted by Cas-OFFinder.** No off-target indels were detected at the homologous site, which differed from the on-target sites by up to 4 nucleotides, in the mouse genome. Mismatched nucleotides are shown in red and PAM sequences in blue. ON; on-target site, OT; off-target site. Error bar indicates s.e.m. (n = 4).

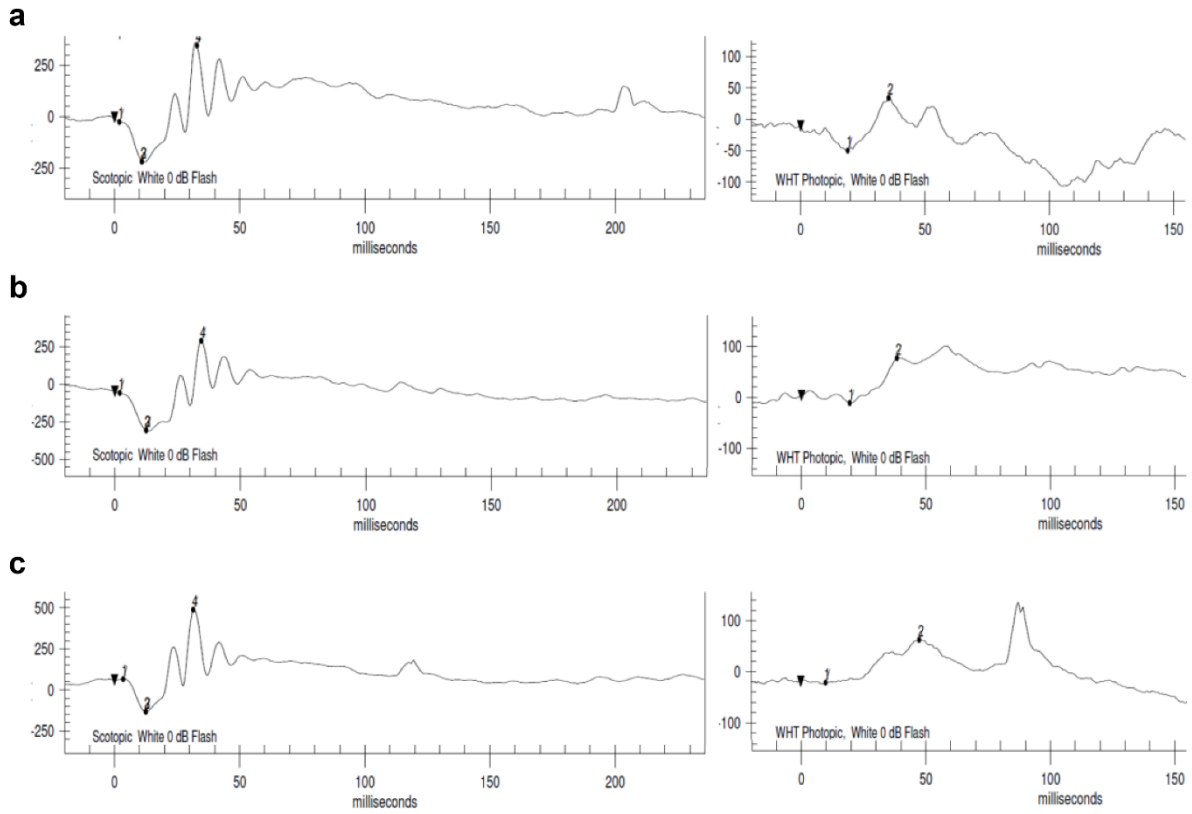

**Supplementary Figure. 7. Full-field ERG in mice treated with AAV-Cpf1-*Vegfa* or -*Hif1a* compared to normal control mice.** (a) Representative scotopic (left) and photopic (right) responses of normal control mice. (b) Representative scotopic (left) and photopic (right) responses of mice treated with AAV-Cpf1-*Vegfa*. (c) Representative scotopic (left) and photopic (right) responses of mice treated with AAV-Cpf1-*Hif1a*.



**Supplementary Table 1. LbCpf1 crRNA list used in this study.**

| #  | Target site           | crRNA     | Target sequences (5' to 3') | PAM (5' to 3') | Indels* (%) | s.e.m (%) |
|----|-----------------------|-----------|-----------------------------|----------------|-------------|-----------|
| 1  |                       | Vegfa-TS1 | GGAGGCCCGTCCGGGGCCGGCGC     | TTTC           | 1.7         | 0.20      |
| 2  |                       | Vegfa-TS2 | TGCTCTCTTGGGTGCACTGGACC     | TTTC           | 13.7        | 1.34      |
| 3  |                       | Vegfa-TS3 | CTGCTGTACCTCCACCATGCCAA     | TTTA           | 19.2        | 1.35      |
| 4  | mouse<br><i>Vegfa</i> | Vegfa-TS4 | GTGAGGTTTGTATCCGCATGATCT    | TTTG           | 12.9        | 0.85      |
| 5  |                       | Vegfa-TS5 | TTCTGTCTTTCTTTGGTCTGCAG     | TTTG           | 5.1         | 0.38      |
| 6  |                       | Vegfa-TS6 | TGGCTTTGTTCTGTCTTTCTTTG     | TTTC           | 6.4         | 0.31      |
| 7  |                       | Vegfa-TS7 | CTGGCTTTGTTCTGTCTTTCTTT     | TTTT           | 1.1         | 0.14      |
| 8  |                       | Vegfa-TS8 | TCTACCCACTGCAGACCAAAGAA     | TTTC           | 12.1        | 0.72      |
| 9  |                       | Hif1a-TS1 | ACTCATCCATGTGACCATGAGGA     | TTTT           | 1.5         | 0.08      |
| 10 |                       | Hif1a-TS2 | CTAAAGGACAAGTCACCACAGGA     | TTTA           | 16.3        | 0.87      |
| 11 |                       | Hif1a-TS3 | GCAAGCATCCTGTACTGTCCTGT     | TTTG           | 12.2        | 0.24      |
| 12 | Mouse<br><i>Hif1a</i> | Hif1a-TS4 | GGCAAGCATCCTGTACTGTCCTG     | TTTT           | 4.7         | 1.03      |
| 13 |                       | Hif1a-TS5 | AACCCAGACATATCCACCTCTTT     | TTTC           | 24.5        | 0.36      |
| 14 |                       | Hif1a-TS6 | TTGAAGGGAGAAAATCAAGTCGT     | TTTG           | 21.7        | 0.63      |
| 15 |                       | Hif1a-TS7 | GACAGTGGTATTATTCAGCACGA     | TTTT           | 10.9        | 0.35      |
| 16 |                       | Hif1a-TS8 | ACAGTGGTATTATTCAGCACGAC     | TTTG           | 16.4        | 0.47      |
| 17 | Human<br><i>DNMT</i>  | DNMT-TS1  | CTGATGGTCCATGTCTGTTACTC     | TTTC           | N/A         | N/A       |

\*Indel frequencies (%) in Fig.1a.

**Supplementary Table 2. Indel frequencies at on-target and potential off-target validated by Digenome-seq. Mismatched nucleotides are shown in blue and PAM sequences in red.**

| Target            |            | Location |           | Target sequence (5' to 3')                           | Cleavage score |
|-------------------|------------|----------|-----------|------------------------------------------------------|----------------|
| <i>Vegfa</i> -TS3 | On-target  | Chr17    | 46031291  | <b>TTT</b> ACTGCTGTACCTCCACCATGCCAA                  | 22.4           |
|                   | Off-target | Chr11    | 105284128 | <b>TTT</b> ACTG <b>t</b> TGTACCTCCACCAT <b>ttggt</b> | 6.2            |
| <i>Hif1a</i> -TS3 | On-target  | Chr12    | 73937675  | <b>TTT</b> <b>G</b> GCAAGCATCCTGTACTGTCTGT           | 23.2           |

**Supplementary Table 3. Indel frequencies at on-target and potential off-target validated by Digenome-seq.** Mismatched nucleotides are shown in blue and PAM sequences in red.

| Target    |               | Location | Target sequence (5' to 3')                           | Indel frequency (%) <sup>*</sup> |          | Indel frequency (%) <sup>**</sup> |          |
|-----------|---------------|----------|------------------------------------------------------|----------------------------------|----------|-----------------------------------|----------|
|           |               |          |                                                      | (-) RGEN                         | (+) RGEN | (-) RGEN                          | (+) RGEN |
| Vegfa-TS3 | On-target     | Chr17    | <b>TTT</b> ACTGCTGTACCTCCACCATGCCAA                  | 0.00                             | 6.45     | 0.00                              | 57.17    |
|           | Vegfa-TS3-OT1 | Chr11    | <b>TTT</b> ACTG <b>t</b> TGTACCTCCACCAT <b>ttggt</b> | 0.003                            | 0.02     | 0.00                              | 0.17     |

RPE\*, Retina\*\*

**Supplementary Table 4. Indel frequencies at on-target and potential off-target predicted by Cas-OFFinder.** Mismatched nucleotides are shown in blue and PAM sequences in red.

| Target            |                       | Location | Target sequence (5' to 3')                                             | Indel frequency (%) <sup>*</sup> |          | Indel frequency (%) <sup>**</sup> |          |
|-------------------|-----------------------|----------|------------------------------------------------------------------------|----------------------------------|----------|-----------------------------------|----------|
|                   |                       |          |                                                                        | (-) RGEN                         | (+) RGEN | (-) RGEN                          | (+) RGEN |
| <i>Vegfa</i> -TS3 | On-target             | Chr17    | <b>TTT</b> ACTGCTGTACCTCCACCATGCCAA                                    | 0.00                             | 6.45     | 0.00                              | 57.17    |
|                   | <i>Vegfa</i> -TS3-OT1 | Chr10    | <b>TTT</b> CCTGCTG <b>g</b> ACT <b>Ttt</b> ACCATGCCAA                  | 0.00                             | 0.01     | 0.007                             | 0.00     |
| <i>Hif1a</i> -TS3 | On-target             | Chr12    | <b>TTT</b> GCAAGCATCCTGTACTGTCCTGT                                     | 0.00                             | 17.23    | 0.00                              | 59.21    |
|                   | <i>Hif1a</i> -TS3-OT1 | Chr14    | <b>TTT</b> GCAAGCAT <b>Ct</b> T <b>c</b> TACT <b>t</b> TCCT <b>t</b> T | 0.00                             | 0.01     | 0.00                              | 0.01     |

RPE\*, Retina\*\*
